# Supplementary material for: Alanine alters the carbohydrate metabolism of rainbow trout: glucose flux and cell signaling
Source: Oxford University Press journal article supplement (doi:10.1242/jeb.232918), 2021-07-08
Supplement: jeb232918supp.pdf [file jeb232918supp.pdf]

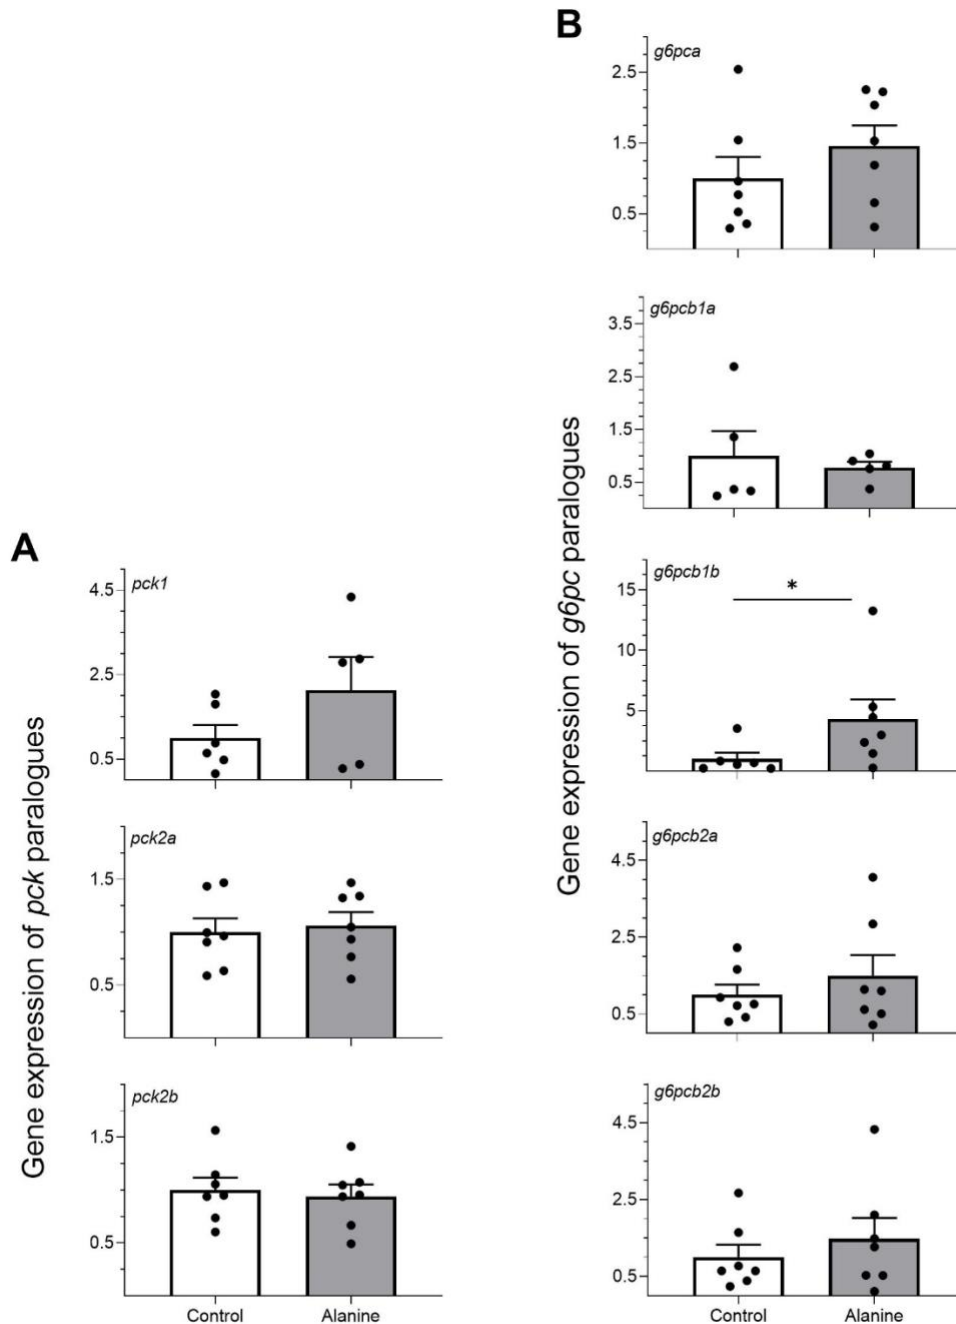

Fig. S1

**Fig. S1. Liver relative mRNA abundance of (A) phosphoenolpyruvate carboxykinase (*pck*) and (B) glucose-6-phosphatase (*g6pc*) paralogues in the control and alanine-infused rainbow trout.** Data were normalized by the reference gene  $\beta$ -actin. The mean + s.e.m. are represented (N=5-7). Filled circles represent individual data points. Data were analyzed using two-tailed t-test and means significantly different from control are indicated by an asterisk ( $p < 0.05$ ).

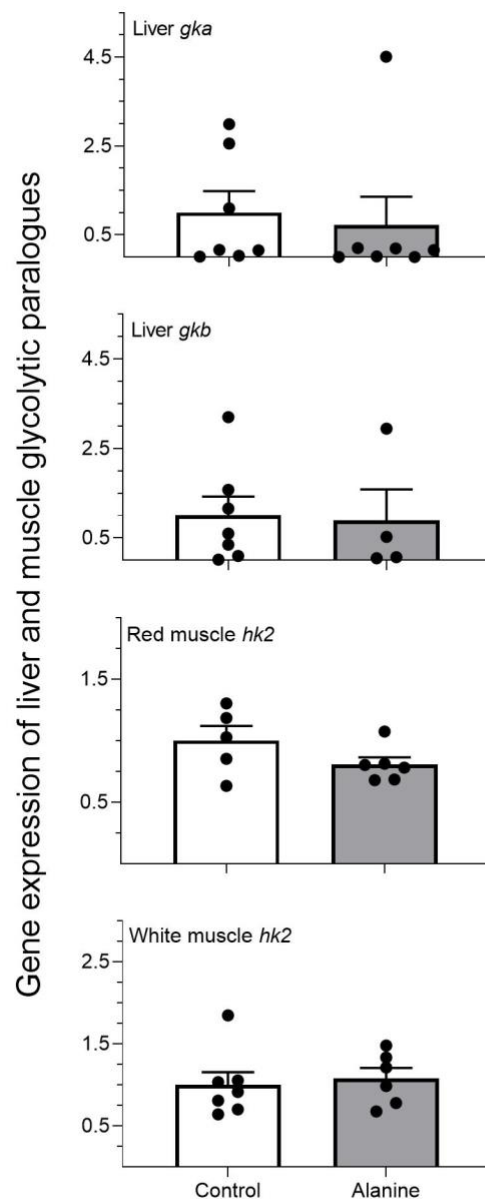

Fig. S2

**Fig. S2. Relative mRNA abundance of glucokinase (*gk*) in the liver and hexokinase 2 (*hk2*) in the red and white muscle in the control and alanine-infused rainbow trout.** Data were normalized by the reference gene  $\beta$ -actin for the liver and *ef1a* for red and white muscle. The mean + s.e.m. are represented (N=4-7). Filled circles represent individual data points. Data were analyzed using two-tailed t-test. Alanine had no effect on the measured glycolytic mRNA transcript abundance ( $p>0.05$ ).

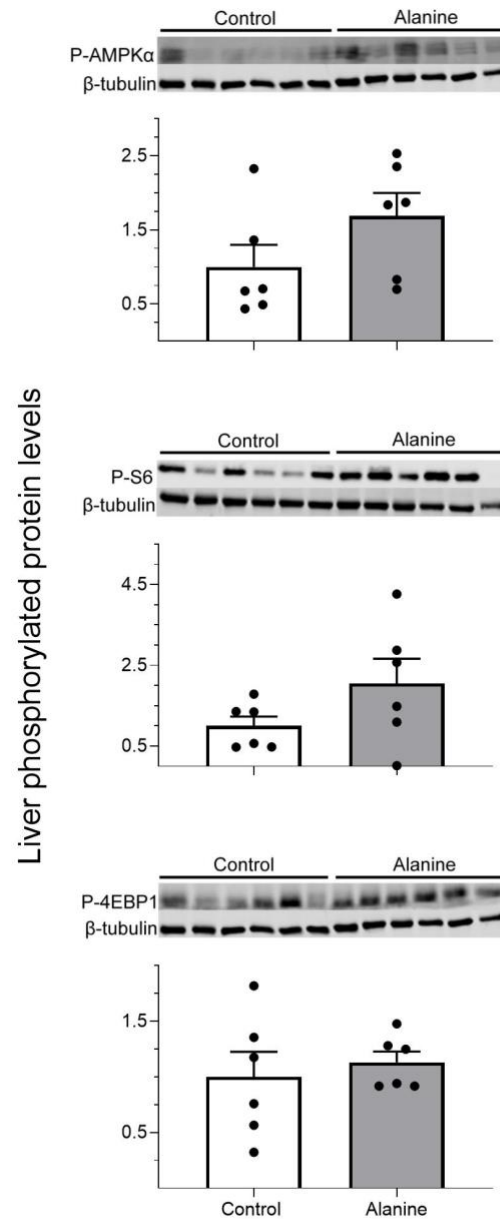

Fig. S3

**Fig. S3. Liver relative abundance of phosphorylated AMPKα (at T172), ribosomal protein S6 (S6; at S235/236) and eukaryotic translation initiation factor 4E binding protein 1 (4EBP1; at T37/46) in the control and the alanine-infused groups.** Data were normalized by β-tubulin and are represented as fold changes relative to the control group. The western blot of each phosphorylated protein is shown on top of its figure. The mean + s.e.m. are represented (N=6). Filled circles represent individual data points. Data were analyzed using two-tailed t-test. Alanine had no effect on the phosphorylated level of these proteins in the liver ( $p > 0.05$ ).

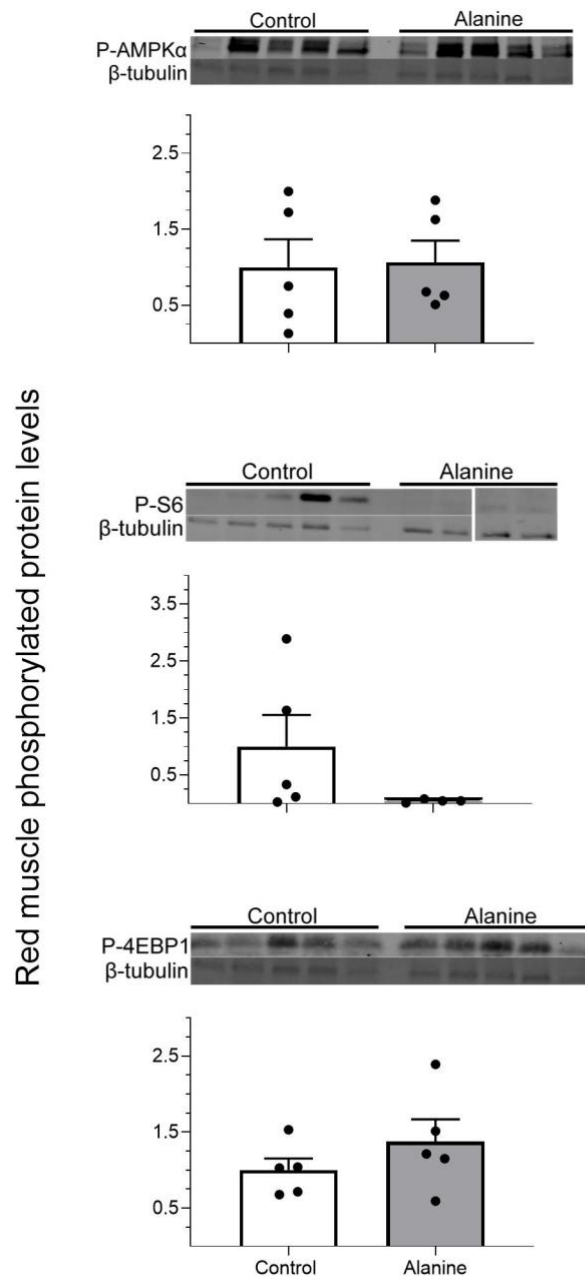

Fig. S4

**Fig. S4. Red muscle relative levels of phosphorylated AMPKα (at T172), S6 (at S235/236) and 4EBP1 (at T37/46) in the control and the alanine-infused groups.** Data were normalized by β-tubulin and are represented as fold changes relative to the control group. The western blot of each phosphorylated protein is shown on top of its figure. The mean + s.e.m. are represented (N=4-5). Filled circles represent individual data points. Data were analyzed using two-tailed t-test. Alanine had no effect on the phosphorylated level of these proteins in the red muscle ( $p > 0.05$ ). A white space indicates the removal of a lane (outlier).

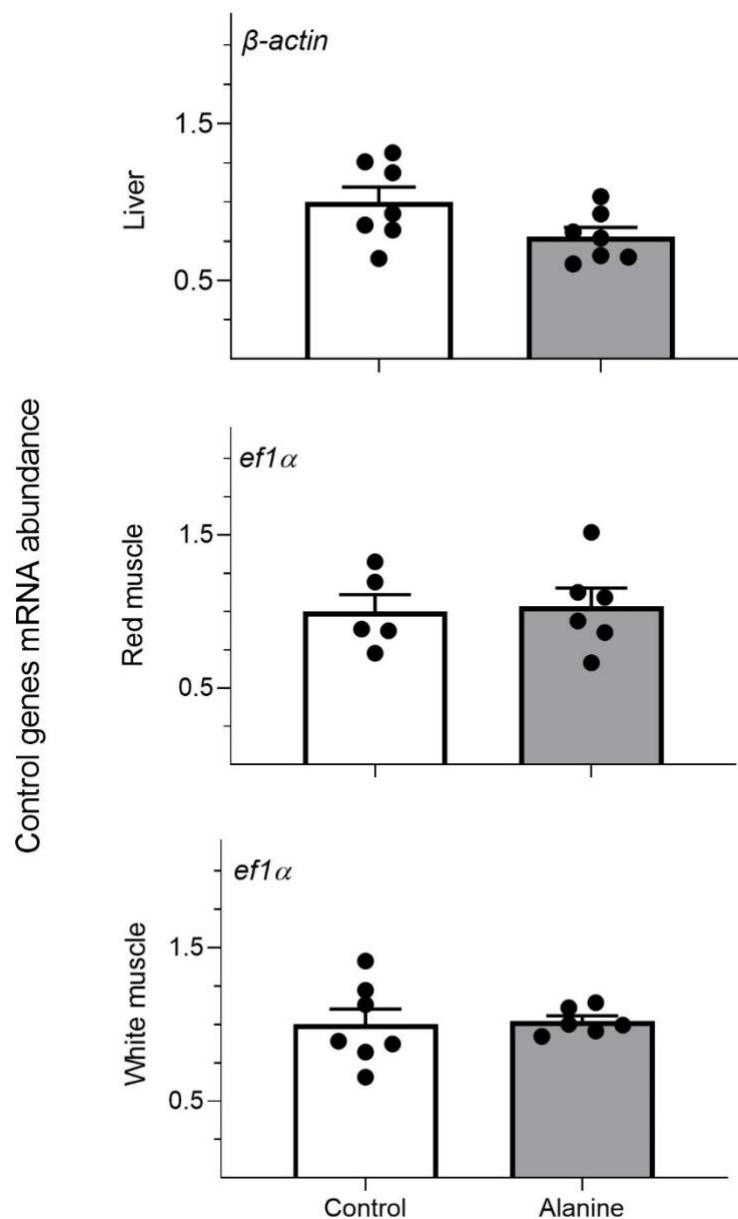

Fig. S5

**Fig. S5. Relative mRNA abundance of the control genes  $\beta$ -actin in the liver and elongation factor 1 $\alpha$  ( $ef1\alpha$ ) in the muscle of the control and alanine-infused rainbow trout.** Data points are relative to the control group for each gene. The mean + s.e.m. are represented (N=5-7). Filled circles represent individual data points. Data were analyzed using two-tailed t-test. Alanine had no effect on the measured mRNA transcript abundance of the control genes ( $p>0.05$ ).

**Table S1.** Primer pair conditions used for mRNA quantification by real-time RT PCR.

| mRNA           | Primer sequence (5' to 3')                                                    | Annealing temperature<br>°C | Efficiency %, R <sup>2</sup> | Reference             |
|----------------|-------------------------------------------------------------------------------|-----------------------------|------------------------------|-----------------------|
| <i>pck1</i>    | F: ACAGGGTGAGGCAGATGTAGG<br>R: CTAGTCTGTGGAGGTCTAAGGGC                        | 55                          | 91.9, 0.995                  | Marandel et al., 2015 |
| <i>pck2a</i>   | F: ACAATGAGATGATGTGACTGCA<br>R: TGCTCCATCACCTACAACCT                          | 55                          | 90.4, 0.997                  | Marandel et al., 2015 |
| <i>pck2b</i>   | F: AGTAGGAGCAGGGACAGGAT<br>R: CCGTTCAGCAAAGGTTAGGC                            | 55                          | 102.8, 0.989                 | Marandel et al., 2019 |
| <i>g6pca</i>   | F: GATGGCTTGACGTTCTCCT<br>R: AGATCCAGGAGAGTCCTCC                              | 55                          | 91.9, 0.995                  | Marandel et al., 2015 |
| <i>g6pcb1a</i> | F: GCAAGGTCCAAAGATCAGGC<br>R: GCCAATGTGAGATGTGATGGG                           | 59                          | 105.9, 0.975                 | Marandel et al., 2015 |
| <i>g6pcb1b</i> | F: GCTACAGTGCTCTCCTTCTG<br>R: TCACCCCATAGCCCTGAAA                             | 55                          | 91.6, 0.997                  | Marandel et al., 2015 |
| <i>g6pcb2a</i> | F: ATCGGACAATACACACAGAACT<br>R: CAACTGATCTATAGCTGCTGCCT                       | 54                          | 91.3, 0.994                  | Marandel et al., 2015 |
| <i>g6pcb2b</i> | F: CCTCTGCTCTTCTGACGTAG<br>R: TGTCCATGGCTGCTCTCTAG                            | 55                          | 92.3, 0.985                  | Marandel et al., 2015 |
| <i>gka</i>     | F: CTGCCCACCTACGTCTGT<br>R: GTCATGGCGTCCTCAGAGAT                              | 54                          | 96.3, 0.993                  | Marandel et al., 2015 |
| <i>gkb</i>     | F: TCTGTGCTAGAGACAGCCC<br>R: CATTTTGACGCTGGACTCCT                             | 57                          | 90.9, 0.993                  | Marandel et al., 2015 |
| <i>hk2</i>     | F: TGAAAAGGGACATGCAGAGA<br>R: GGCCCTAAAAGCAAGGAAA                             | 58                          | 92.3-96.1, 0.992-0.988       | Designed              |
| <i>glut4a</i>  | F: CATCTTTGCAGTGCTCCTTG                                                       | 56                          | 106.1-101.1, 0.997-0.982     | Liu et al., 2017      |
| <i>glut4b</i>  | R: CAGCTCTGTACTCTGCTTGC<br>F: TCGGCTTTGGCTTCCAATATG                           | 56                          | 101.4-106.2, 0.995-0.996     | Liu et al., 2017      |
| <i>β-actin</i> | R: GTTTGCTGAAGGTGTTGGAG<br>F: AGAGCTACGAGCTGCCTGAC<br>R: GTGTTGGCGTACAGGTCCTT | 60                          | 90.4, 0.996                  | Moltesen et al., 2016 |
| <i>ef1α</i>    | F: CACATCGCCTGCAAGTTT<br>R: GAAGCTCTCCACACACATGG                              | 58                          | 106.6-110.1, 0.985-0.988     | Designed              |

F and R represent forward and reverse primer sequences, respectively. Primer sequences for *hk2* and *ef1α* was designed using Primer 3 algorithm. The efficiency and R<sup>2</sup> values are presented for both the red and white muscle *glut4a*, *glut4b*, *hk2* and *ef1α*. The reference genes for the liver and muscle are *β-actin* and *ef1α*, respectively.
